# Supplementary material for: Isothermal titration calorimetry as a new tool to investigate chiral interactions at crystal surfaces
Source: Royal Society of Chemistry journal article supplement (doi:10.1039/c0cc05403h), 2011-01-01
Supplement: c0cc05403h.pdf [file c0cc05403h.pdf]

## Electronic Supplementary Information (ESI)

### Isothermal titration calorimetry as a new tool to investigate chiral interactions at crystal surfaces<sup>†</sup>

Ayelet Shval<sup>a</sup> and Yitzhak Mastai<sup>a</sup>

*Department of Chemistry and the Institute of Nanotechnology*

*Bar-Ilan University, Ramat-Gan 52900 Israel.*

#### Isothermal titration calorimetry (ITC) experiments

The ITC measurements were performed with a VP-ITC calorimeter produced by MicroCal Inc. (Northampton, MA). The chiral ITC measurements were performed as follows: First 25 mg of each tyrosin enantiomers powders was manually grinded and suspended in 5 mL double distilled water. The reservoir cell was filled with 1.442 mL of solution of the L or D tyrosin and thermostated at 25<sup>0</sup>C. Stock solutions of 0.5M of either L- Threonine or L Phenylalanine in distilled water at pH = 7.10 were prepared. Injection volumes of 5.0  $\mu$ L were delivered during 30 min, with the time interval of 200 seconds between the injections and the reference cell was filled with water

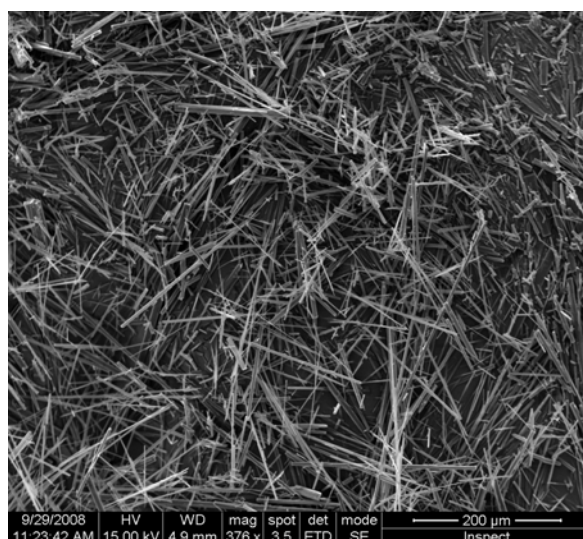

**Figure S1** Scanning electron micrograph of L-tyrosine crystals crystallized from a supersaturated aqueous solution.

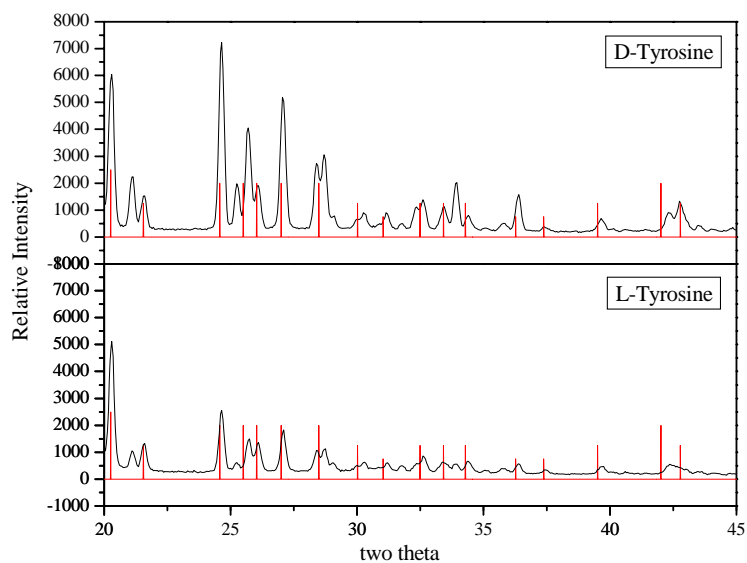

**Figure S2** – X-ray diffraction pattern of L and D Tyrosin crystals

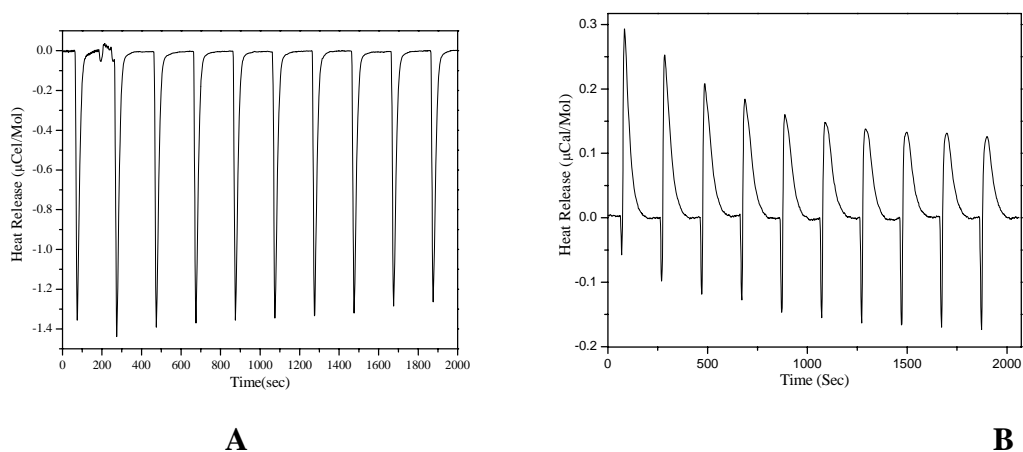

**A**

**B**

**Figure S3** ITC profile of the heat flow per injection in dilution of (A) L- phenylalanine (B) L threonine.
